# Supplementary material
Source: MDPI journal article supplement (https://www.mdpi.com/2079-6439/10/6/51)
Supplement: s1 [file s1]

# Understanding the PLA-wood adhesion interface for the development of PLA-bonded softwood laminates

Warren J. Grigsby,\* Desiree Torayno, Marc Gaugler

## Supplementary Materials

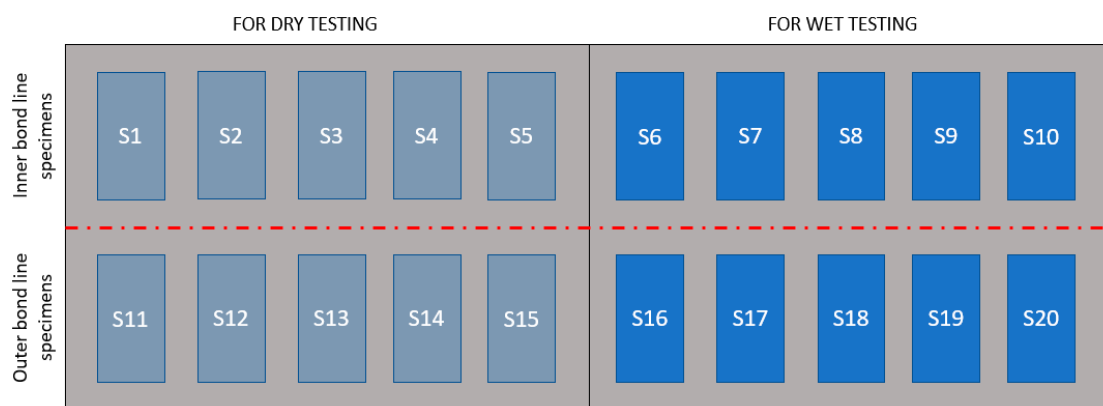

Figure S1. Cutting pattern employed to generate 25 mm x 100 mm test specimens which were then cross-cut to isolate the bondline (inner and outer) for testing bond line.

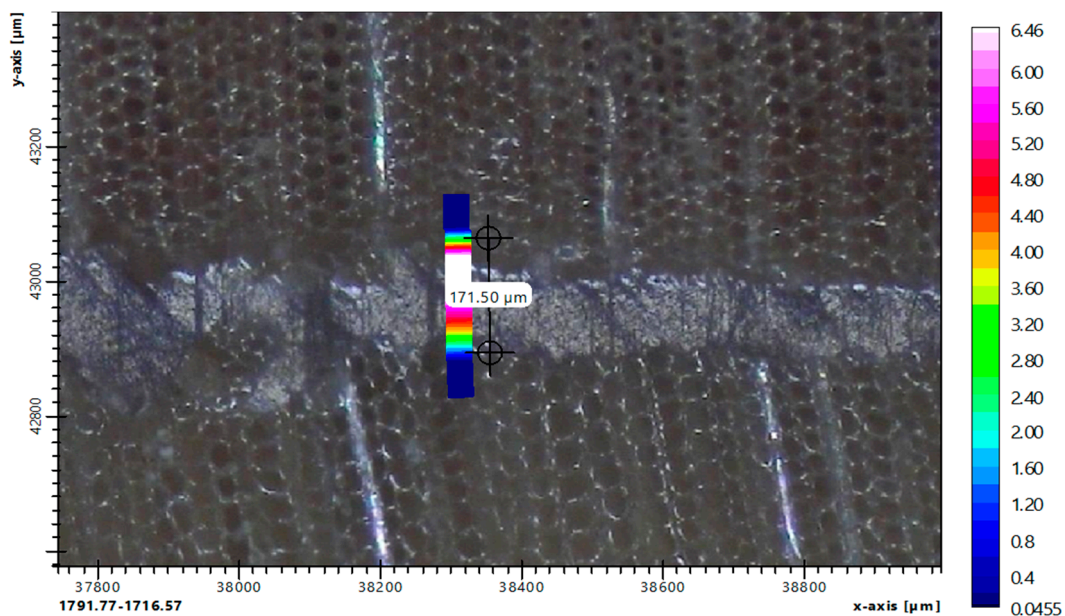

Figure S2. Selected example from chemical spatial imaging analysis showing extent of PLA migration (penetration) from the bondline. Semi-crystalline PLA, 180 °C, 360 seconds.

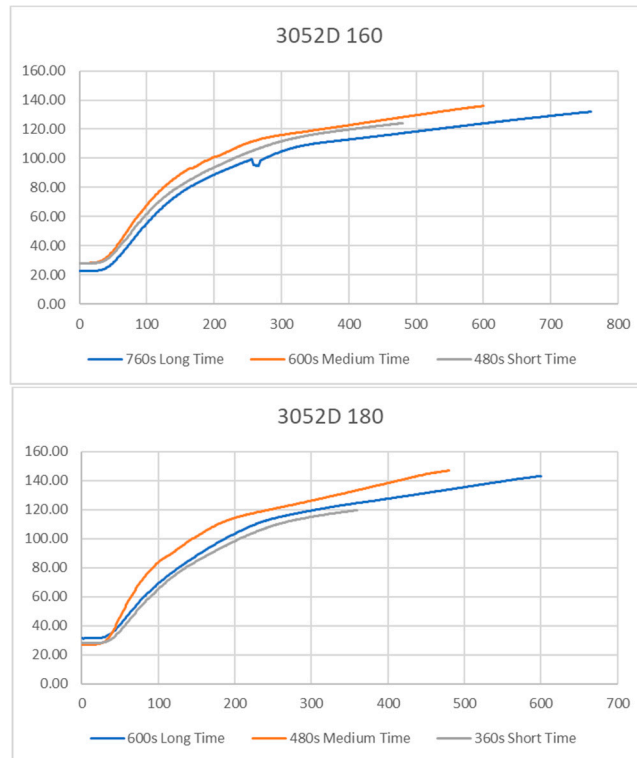

Figure S3. Selected internal panel temperature profiles for 5-ply panels formed at 160 °C (top) and 180 °C (bottom) pressing temperatures with ether semi-crystalline PLA (3052D).

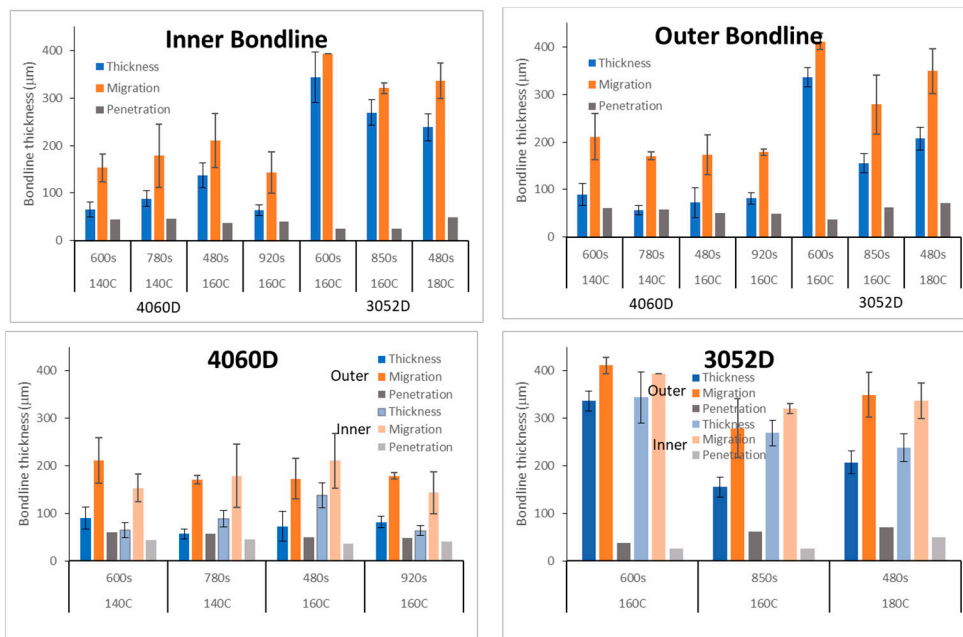

Figure S4. Comparisons of PLA bondline thickness and penetration values (5-ply samples)

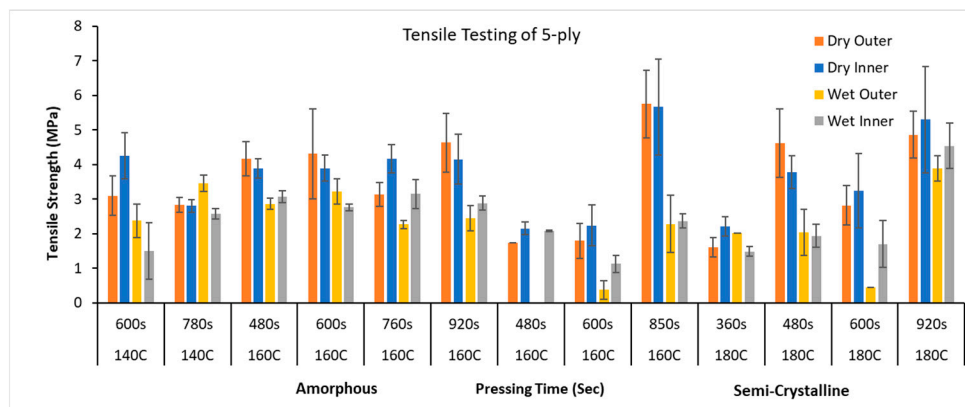

Figure S5. Comparisons of bondline tensile strength values (5-ply samples)

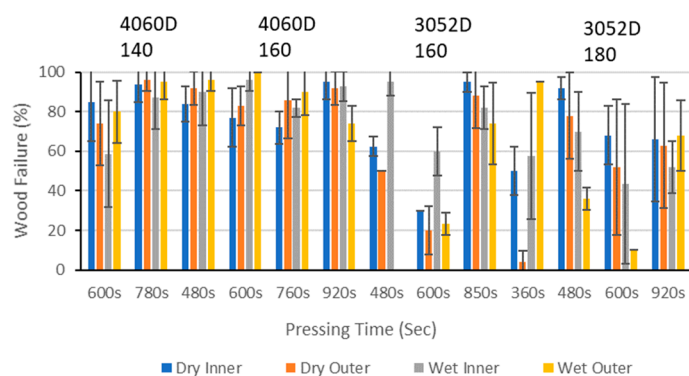

Figure S6. Comparisons of bondline tensile strength values (5-ply samples)

Table S1. Relationships of dry and wet tensile strength with PLA bondline thickness and penetration values for inner and outer bondlines of 5-ply panels.

| Tensile strength |     | Thickness      |                | Penetration    |                |
|------------------|-----|----------------|----------------|----------------|----------------|
|                  |     | Inner          | Outer          | Inner          | Outer          |
|                  |     | R <sup>2</sup> | R <sup>2</sup> | R <sup>2</sup> | R <sup>2</sup> |
| 4060D            | dry | 0.04           | 0.11           | 0.23           | 0.86           |
|                  | wet | 0.33           | 0.96           | 0.33           | 0.01           |
| 3051             | dry | 0.41           | 1              | 0.006          | 0.72           |
|                  | wet | 0.63           | 0.97           | 0.48           | 0.86           |

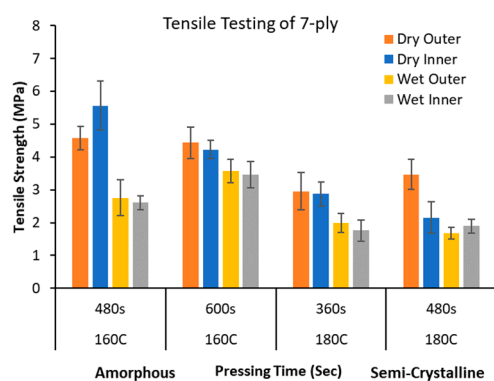

Figure S7. Comparisons of bondline tensile strength values (7-ply samples)

Table S2. Summary of tensile testing results of 5-ply panels formed with radiata pine veneer and semi-crystalline and amorphous PLA grades at differing pressing temperatures and times before soaking

| PLA                              | Press           | Press | Dry tensile strength (MPa) |         |         |         | 24 h cold water soak tensile strength (MPa) |         |         |         |
|----------------------------------|-----------------|-------|----------------------------|---------|---------|---------|---------------------------------------------|---------|---------|---------|
| Grade                            | Temperatu<br>re | Time  | Inner                      |         | Outer   |         | Inner                                       |         | Outer   |         |
|                                  | (°C)            | (sec) | Average                    | Std Dev | Average | Std Dev | Average                                     | Std Dev | Average | Std Dev |
| 5-ply laminate panels            |                 |       |                            |         |         |         |                                             |         |         |         |
| Amorphous                        | 140             | 600s  | 4.26                       | 0.67    | 3.10    | 0.58    | 1.50                                        | 0.83    | 2.38    | 0.49    |
|                                  |                 | 780s  | 2.81                       | 0.18    | 2.84    | 0.21    | 2.57                                        | 0.15    | 3.46    | 0.23    |
|                                  | 160             | 480s  | 3.89                       | 0.27    | 4.17    | 0.49    | 3.08                                        | 0.17    | 2.87    | 0.17    |
|                                  |                 | 600s  | 3.90                       | 0.37    | 4.32    | 1.30    | 2.76                                        | 0.10    | 3.22    | 0.37    |
|                                  |                 | 760s  | 4.17                       | 0.41    | 3.14    | 0.35    | 3.15                                        | 0.42    | 2.27    | 0.13    |
|                                  |                 | 920s  | 4.15                       | 0.72    | 4.63    | 0.86    | 2.89                                        | 0.21    | 2.45    | 0.37    |
| Semi-Crystalline                 | 160             | 480s  | 2.15                       | 0.18    | 1.75    | -       | 2.09                                        | 0.02    | -       | -       |
|                                  |                 | 600s  | 2.24                       | 0.59    | 1.80    | 0.50    | 1.13                                        | 0.25    | 0.38    | 0.27    |
|                                  |                 | 850s  | 5.66                       | 1.39    | 5.75    | 0.99    | 2.37                                        | 0.20    | 2.28    | 0.82    |
|                                  | 180             | 360s  | 2.21                       | 0.27    | 1.61    | 0.29    | 1.49                                        | 0.14    | 2.01    | -       |
|                                  |                 | 480s  | 3.79                       | 0.48    | 4.62    | 0.99    | 1.94                                        | 0.34    | 2.04    | 0.66    |
|                                  |                 | 600s  | 3.24                       | 1.07    | 2.82    | 0.57    | 1.70                                        | 0.67    | 0.46    | -       |
|                                  |                 | 920s  | 5.30                       | 1.53    | 4.86    | 0.68    | 4.54                                        | 0.65    | 3.89    | 0.36    |
| 7 - ply laminate panels          |                 |       |                            |         |         |         |                                             |         |         |         |
| Amorp<br>Crystall<br>hous<br>ine | 160             | 480s  | 5.56                       | 0.75    | 4.58    | 0.36    | 2.61                                        | 0.22    | 2.76    | 0.54    |
|                                  |                 | 600s  | 4.23                       | 0.28    | 4.43    | 0.49    | 3.47                                        | 0.40    | 3.57    | 0.35    |
| Semi-<br>Crystall<br>hous<br>ine | 180             | 360s  | 2.88                       | 0.37    | 2.95    | 0.56    | 1.76                                        | 0.33    | 1.99    | 0.29    |
|                                  |                 | 480s  | 2.15                       | 0.48    | 3.47    | 0.45    | 1.89                                        | 0.21    | 1.67    | 0.18    |
